# Supplementary material
Source: HighWire-hosted journal article supplement (https://bmjopen.bmj.com/content/7/8/e016398)
Supplement: inline-supplementary-material-2 [file inline-supplementary-material-2.pdf]

## Supplemental material 2:

### RBC washing protocol with the CATS device.

| Responsible                               | Step | Action                                                                                                                                                                                                 |
|-------------------------------------------|------|--------------------------------------------------------------------------------------------------------------------------------------------------------------------------------------------------------|
| <b>OPERATING ROOM/PATIENT ROOM SET-UP</b> |      |                                                                                                                                                                                                        |
| <b>Autotransfusion Personnel</b>          | 1.   | Enter OR or patient room with CATS (designated for study) and perform patient ID per Patient Identification.                                                                                           |
|                                           | 2.   | Press the I (power on) key until the screen turns on.                                                                                                                                                  |
|                                           | 3.   | Press the Select Program key to choose the desired wash program.<br>a. Use the ↓ key to find the High Quality Wash program.<br>b. Once the High Quality Wash program is selected, press the Enter key. |
|                                           | 4.   | Continue with disposable set-up per CATS.                                                                                                                                                              |
|                                           | 5.   | Press the Prime key.<br><br>NOTE: The CATS device recognizes High Quality Wash as an adult prime and will prime with approximately 283 mL of saline.                                                   |
|                                           | 6.   | Record patient/surgery information on yellow AT worksheet.                                                                                                                                             |
|                                           | 7.   | Record lot numbers of disposables on reverse side of yellow AT worksheet.                                                                                                                              |
|                                           | 8.   | Record the AT tech pager number that is responsible for case on RBC Study Sheet for In-Room Provider (see attachment)                                                                                  |
| <b>PRE – SAMPLE COLLECTION</b>            |      |                                                                                                                                                                                                        |
|                                           | 9.   | Anesthesia will hand over one unit of RBCs to Autotransfusion personnel.                                                                                                                               |
|                                           | 10.  | Record time of RBC unit request on RBC Study Sheet for In-Room Provider                                                                                                                                |
|                                           | 11.  | Place one unit number label on RBC Study Sheet for In-room Provider and one unit number label on RBC BLOOD BAG PLASMA COLLECTION FORM                                                                  |
|                                           | 12.  | Spike one port of the RBC unit with a sterile plasma transfer set device.                                                                                                                              |
|                                           | 13.  | Attach a sterile 10 mL syringe to plasma transfer set device.                                                                                                                                          |
|                                           | 14.  | Draw 6mL of RBCs into syringe.                                                                                                                                                                         |

|                                            |     |                                                                                                                                                                                                                                                |
|--------------------------------------------|-----|------------------------------------------------------------------------------------------------------------------------------------------------------------------------------------------------------------------------------------------------|
|                                            | 15. | Dispense contents of syringe into 10 mL EDTA tube provided by research coordinator.                                                                                                                                                            |
|                                            | 16. | Place one patient ID label on EDTA tube and place in biohazard bag.                                                                                                                                                                            |
|                                            | 17. | Fill out required sections of RBC BLOOD BAG PLASMA COLLECTION FORM:<br><br>a. Site ID = 001<br>b. Subject ID = 4 digit # located on In-Room provider sheet<br>c. Check the box next to Plasma #1 Pre-wash<br>d. Date/time of sample collection |
|                                            | 18. | Fill out pink study card with the following information:<br><br>a. Place one patient ID label in upper left corner<br>b. Record Subject ID<br>c. Record Date/time sample was collected                                                         |
|                                            | 19. | Place the RBC BLOOD BAG PLASMA COLLECTION FORM and pink study card in biohazard bag with EDTA sample.                                                                                                                                          |
|                                            | 20. | Hang RBC unit on CATS pole.                                                                                                                                                                                                                    |
| <b>PRE-DILUTION OF RBCS BEFORE WASHING</b> |     |                                                                                                                                                                                                                                                |
|                                            | 21. | Open one 1000 mL bag of saline and hang on CATS pole                                                                                                                                                                                           |
|                                            | 22. | Open Y-type Blood Set with Pump and close both roller clamps.                                                                                                                                                                                  |
|                                            | 23. | Attach female end of Y-type blood set to the male port on the side of the blood collection reservoir.                                                                                                                                          |
|                                            | 24. | Spike 1000 mL bag of saline and open roller clamp.                                                                                                                                                                                             |
|                                            | 25. | Drain entire volume of saline bag into blood collection reservoir.                                                                                                                                                                             |
|                                            | 26. | Disconnect empty bag and attach another 1000 mL bag of saline.                                                                                                                                                                                 |
|                                            | 27. | Drain 200 mL of saline into blood collection reservoir and close clamp.                                                                                                                                                                        |
|                                            | 28. | Spike one unit of RBCs with remaining spike.                                                                                                                                                                                                   |
|                                            | 29. | Drain contents of RBCs bag into blood collection reservoir.<br><br>NOTE: The pre-dilution of the RBCs/saline mixture is 4:1.                                                                                                                   |
|                                            | 30. | Swirl the contents of the reservoir to ensure proper mixing.                                                                                                                                                                                   |
|                                            | 31. | Track the total amount of saline bags used on Comments section of AT worksheet.                                                                                                                                                                |

| <b>WASHING (PROCESSING)</b>     |     |                                                                                                                                                                                                                                                                                                              |
|---------------------------------|-----|--------------------------------------------------------------------------------------------------------------------------------------------------------------------------------------------------------------------------------------------------------------------------------------------------------------|
|                                 | 32. | Press the start key to begin processing.                                                                                                                                                                                                                                                                     |
|                                 | 33. | Record the following information on the yellow AT worksheet: <ul style="list-style-type: none"> <li>a. Unit number (take label from original bag)</li> <li>b. Processed by</li> <li>c. Processing time (Time processing began until processing finished. E.g. 0915-0930)</li> </ul>                          |
|                                 | 34. | Once blood reservoir is empty, press Save Final PRC key.                                                                                                                                                                                                                                                     |
|                                 | 35. | Press Save Final PRC key on next screen.                                                                                                                                                                                                                                                                     |
|                                 | 36. | Record the remaining information in the processing section of the yellow AT worksheet: <ul style="list-style-type: none"> <li>a. RBC volume recovered</li> <li>b. Transfer pack volume</li> <li>c. Comments section: Track number of saline bags used.</li> </ul>                                            |
| <b>POST - SAMPLE COLLECTION</b> |     |                                                                                                                                                                                                                                                                                                              |
|                                 | 37. | Attach a sterile plasma transfer set device to one port on the reinfusion bag and close clamp.                                                                                                                                                                                                               |
|                                 | 38. | Attach a sterile 10 mL syringe to plasma transfer set device and open clamp.                                                                                                                                                                                                                                 |
|                                 | 39. | Draw 6mL of RBCs into syringe.                                                                                                                                                                                                                                                                               |
|                                 | 40. | Dispense contents of syringe into 10 mL EDTA tube provided by research coordinator                                                                                                                                                                                                                           |
|                                 | 41. | Place one patient ID label on EDTA tube and place in biohazard bag.                                                                                                                                                                                                                                          |
|                                 | 42. | Fill out required sections of RBC BLOOD BAG PLASMA COLLECTION FORM: <ul style="list-style-type: none"> <li>e. Site ID = 001</li> <li>f. Subject ID = 4 digit # located on In-Room provider sheet</li> <li>g. Check the box next to Plasma #2 Post-wash</li> <li>h. Date/time of sample collection</li> </ul> |
|                                 | 43. | Fill out pink study card with the following information: <ul style="list-style-type: none"> <li>d. Place one patient ID label in upper left corner</li> <li>e. Record Subject ID</li> <li>f. Record Date/time sample was collected</li> </ul>                                                                |
|                                 | 44. | Place the RBC BLOOD BAG PLASMA COLLECTION FORM and pink study card in biohazard bag with EDTA sample.                                                                                                                                                                                                        |

|                                                        |     |                                                                                                                                                                                                                                                                                                                                                                                                                                                                                                                             |
|--------------------------------------------------------|-----|-----------------------------------------------------------------------------------------------------------------------------------------------------------------------------------------------------------------------------------------------------------------------------------------------------------------------------------------------------------------------------------------------------------------------------------------------------------------------------------------------------------------------------|
|                                                        | 45. | Open clamp and drain contents of reinfusion bag into transfer pack.                                                                                                                                                                                                                                                                                                                                                                                                                                                         |
|                                                        | 46. | Expel air from transfer pack.                                                                                                                                                                                                                                                                                                                                                                                                                                                                                               |
|                                                        | 47. | Seal transfer pack using the hand sealer and two hand sealer clips.<br>Cut between the clips.                                                                                                                                                                                                                                                                                                                                                                                                                               |
| <b>LABELING</b>                                        |     |                                                                                                                                                                                                                                                                                                                                                                                                                                                                                                                             |
|                                                        | 48. | Complete Research Only - Washed Allogenic Blood label in the following manner<br><br><ul style="list-style-type: none"> <li>a. Retrieve unit number label from original RBC unit and place in the upper left corner of blood label.</li> <li>b. Place a patient ID label on the lower left corner.</li> <li>c. Record the volume of the washed unit.</li> <li>d. Record the time (hh:mm) that the CATS began washing the RBC unit.</li> <li>e. Record the expiration date/time (4 hours from beginning of wash).</li> </ul> |
|                                                        | 49. | Affix label to transfer pack.                                                                                                                                                                                                                                                                                                                                                                                                                                                                                               |
| <b>ADMINISTRATION</b>                                  |     |                                                                                                                                                                                                                                                                                                                                                                                                                                                                                                                             |
|                                                        | 50. | Perform visual inspection of unit and release unit to Anesthesia/nursing/Perfusion personnel.<br><br><ul style="list-style-type: none"> <li>a. Record initials in the "Inspected and Release by" box on the AT worksheet.</li> <li>b. Record Time transfused/volume transfused.</li> </ul>                                                                                                                                                                                                                                  |
| <b>SENDING SAMPLES</b>                                 |     |                                                                                                                                                                                                                                                                                                                                                                                                                                                                                                                             |
|                                                        | 51. | OPERATING ROOM:<br><br><ul style="list-style-type: none"> <li>a. Place samples in OR window for lab personnel.</li> <li>b. Press the LAB button the communication panel.</li> </ul> PATIENT ROOM:<br><br><ul style="list-style-type: none"> <li>a. Using the nearest small tube station, send all collected samples to 4<sup>th</sup> tower.</li> </ul>                                                                                                                                                                     |
| <b>ADDITIONAL WASHED RBCS DURING STUDY TIME PERIOD</b> |     |                                                                                                                                                                                                                                                                                                                                                                                                                                                                                                                             |
|                                                        | 52. | If additional units are requested to be washed in the current OR or patient room, repeat the following sections in this procedure:<br><br><ul style="list-style-type: none"> <li>a. Pre-sample collection</li> <li>b. Pre-dilution of RBCs before washing</li> <li>c. Processing</li> <li>d. Post-Sample Collection</li> <li>e. Labeling</li> </ul>                                                                                                                                                                         |

|  |     |                                                                                                                                                                                                                                                                                                                                    |
|--|-----|------------------------------------------------------------------------------------------------------------------------------------------------------------------------------------------------------------------------------------------------------------------------------------------------------------------------------------|
|  |     | f. Administration                                                                                                                                                                                                                                                                                                                  |
|  | 53. | After surgery is complete, perform tear-down/cleaning of CATS device per procedure.                                                                                                                                                                                                                                                |
|  | 54. | Transport CATS device and yellow AT worksheet with patient information to patient room.                                                                                                                                                                                                                                            |
|  | 55. | Once an order for the first RBC unit is received, go to patient room and perform steps in OPERATING ROOM/PATIENT ROOM SET-UP section.                                                                                                                                                                                              |
|  | 56. | Complete all steps in the following sections in this procedure for all subsequent RBC orders: <ul style="list-style-type: none"> <li>a. Pre-sample collection</li> <li>b. Pre-dilution of RBCs before washing</li> <li>c. Processing</li> <li>d. Post-Sample Collection</li> <li>e. Labeling</li> <li>f. Administration</li> </ul> |
|  | 57. | After the last order for RBCs and the washing process has been completed, perform tear-down/cleaning of CATS device per procedure.                                                                                                                                                                                                 |
|  | 58. | Transport CATS device to Autotransfusion office.                                                                                                                                                                                                                                                                                   |
|  | 59. | Place yellow AT worksheet on Quality Specialist desk.                                                                                                                                                                                                                                                                              |
